# Supplementary material for: Association of Anxiety With High-Cost Health Care Use Among Individuals With Type 2 Diabetes
Source: Oxford University Press journal article supplement (doi:10.2337/dc18-1553), 2019-06-18
Supplement: dc181553supplementarydata.pdf [file dc181553supplementarydata.pdf]

SUPPLEMENTARY DATA

**Association of Anxiety With High-Cost Health Care Use Among Individuals With Type 2 Diabetes**

Esti Iturralde, PhD<sup>1</sup>, Felicia W. Chi, MPH<sup>1</sup>, Richard W. Grant, MD, MPH<sup>1</sup>, Constance Weisner, DrPH, MSW<sup>1,2</sup>, Lucas Van Dyke, MD<sup>3</sup>, Alix Pruzansky, MD, MPH<sup>3</sup>, Sandy Bui, BA<sup>3</sup>, Philip Madvig, MD, MS<sup>3</sup>, Robert Pearl, MD<sup>3</sup>, Stacy A. Sterling, DrPH, MPH, MSW<sup>1</sup>

<sup>1</sup> Division of Research, Kaiser Permanente Northern California

<sup>2</sup> University of California, San Francisco

<sup>3</sup> The Permanente Medical Group

SUPPLEMENTARY DATA

**Supplementary Table S1. Diabetes Complications and Other Medical Conditions Among Participants With and Without Diagnosed Anxiety**

| Health conditions diagnosed in 2008-2011 | No anxiety diagnosis | Any anxiety diagnosis | Total sample   | <i>p</i> value |
|------------------------------------------|----------------------|-----------------------|----------------|----------------|
| Number of people, <i>n</i> (row percent) | 125,012 (87.1)       | 18,561 (12.9)         | 143,573 (—)    | —              |
| <u>Diabetes complications</u>            |                      |                       |                |                |
| Nephropathy                              | 42,726 (34.2)        | 6,216 (33.5)          | 48,942 (34.1)  | .07            |
| Neuropathy                               | 26,829 (21.5)        | 5,384 (29.0)          | 32,213 (22.4)  | < .001         |
| Cardiovascular disease                   | 25,586 (20.5)        | 4,501 (24.3)          | 30,087 (21.0)  | < .001         |
| Retinopathy                              | 24,511 (19.6)        | 3,363 (18.1)          | 27,874 (19.4)  | < .001         |
| Peripheral vascular disease              | 10,390 (8.3)         | 1,823 (9.8)           | 12,213 (8.5)   | < .001         |
| Lower limb ulcers or amputations         | 8,423 (6.7)          | 1,603 (8.6)           | 10,026 (7.0)   | < .001         |
| Cerebrovascular disease                  | 7,441 (6.0)          | 1,648 (8.9)           | 9,089 (6.3)    | < .001         |
| Metabolic complications                  | 3,251 (2.6)          | 733 (4.0)             | 3,984 (2.8)    | < .001         |
| Any diabetes complication                | 74,674 (59.7)        | 11,865 (63.9)         | 86,539 (60.3)  | < .001         |
| <u>Other health conditions</u>           |                      |                       |                |                |
| Injury/poisoning                         | 62,444 (50.0)        | 12,217 (65.8)         | 74,661 (52.0)  | < .001         |
| Hypertension                             | 104,531 (83.6)       | 15,940 (85.9)         | 120,471 (83.9) | < .001         |
| Lower back pain                          | 43,280 (34.6)        | 9,534 (51.4)          | 52,814 (36.8)  | < .001         |
| Arthritis                                | 36,455 (29.2)        | 7,114 (38.3)          | 43,569 (30.4)  | < .001         |
| Asthma                                   | 20,922 (16.7)        | 5,227 (28.2)          | 26,149 (18.2)  | < .001         |
| Headache                                 | 17,577 (14.1)        | 5,634 (30.4)          | 23,211 (16.2)  | < .001         |
| Chronic obstructive pulmonary disorder   | 18,368 (14.7)        | 4,218 (22.7)          | 22,586 (15.7)  | < .001         |
| Pneumonia                                | 12,021 (9.6)         | 2,796 (15.1)          | 14,817 (10.3)  | < .001         |

*Note.* *n* (column percent) presented unless otherwise specified.

SUPPLEMENTARY DATA

**Supplementary Figure S1. ICD-9-CM Diagnostic Codes for Diabetes Complications**

| <b>Diabetes complication</b>     | <b>ICD-9-CM diagnostic code</b>                                                                                                                               |
|----------------------------------|---------------------------------------------------------------------------------------------------------------------------------------------------------------|
| Nephropathy                      | 250.4x, 585.x                                                                                                                                                 |
| Neuropathy                       | 250.6x, 357.2                                                                                                                                                 |
| Cardiovascular disease           | 410.xx, 411.xx, 412, 414.x, 428.x, 440.xx                                                                                                                     |
| Retinopathy                      | 250.5x, 362.0x, 362.10                                                                                                                                        |
| Peripheral vascular disease      | 250.7x, 443.9, 444.xx                                                                                                                                         |
| Lower limb ulcers or amputations | 681.9, 682.7, 707.1, 707.13–707.19, 707.8–707.9, 730.06–730.07, 730.09, 730.16–730.17, 730.19, 730.26–730.27, 730.29, 891.x–892.2, 895.x–897.x, V497.0–V497.6 |
| Cerebrovascular disease          | 431, 433.xx, 434.xx, 435.x, 436, 437.1                                                                                                                        |
| Metabolic complications          | 250.1, 250.2, 250.3, 251.0, 251.1, 251.2                                                                                                                      |

SUPPLEMENTARY DATA

**Supplementary Figure S2. ICD-9-CM Diagnostic Codes for Non-diabetes-related Health Conditions**

| <b>Health condition</b>                | <b>ICD-9-CM diagnostic code</b>                                                                                                                  |
|----------------------------------------|--------------------------------------------------------------------------------------------------------------------------------------------------|
| Injury/poisoning                       | 800 to 999                                                                                                                                       |
| Hypertension                           | 362.11, 401, 402, 403, 404, 437.2                                                                                                                |
| Lower back pain                        | 724, 724.0, 724.1, 724.2, 724.3, 724.4, 724.5, 724.6, 724.7, 846.0, 847.2                                                                        |
| Arthritis                              | 715, 716                                                                                                                                         |
| Asthma                                 | 493                                                                                                                                              |
| Headache                               | 307.81, 346, 627.2, 784.0                                                                                                                        |
| Chronic obstructive pulmonary disorder | 490, 491, 492, 494, 495, 496                                                                                                                     |
| Pneumonia                              | 480, 481, 482, 483, 484, 485, 486, 487                                                                                                           |
| Alcohol use disorders                  | 291, 305.0, 303                                                                                                                                  |
| Psychoses                              | 295, 297, 298.1, 298.2, 298.3, 298.4, 298.5, 298.6, 298.7, 298.8, 298.9, 296.0, 296.1, 296.4, 296.5, 296.6, 296.7, 296.80, 296.81, 296.89, 296.9 |
| Drug use disorders                     | 292, 304, 305.2, 305.3, 305.4, 305.5, 305.6, 305.7, 305.8, 305.9                                                                                 |
